# Supplementary material
Source: publisher site journal article supplement (https://www.dovepress.com/get_supplementary_file.php?f=247061.docx)
Supplement: Supplementary file 1 [file get_supplementary_file.php]

**Supplementary Table. Participating Trial Sites**

**RIDE (NCT00473382)**

- Allegheny Ophthalmic, Pittsburgh, PA
- Associated Retina Consultants, Phoenix, AZ
- Associates in Ophthalmology, West Mifflin, PA
- Center for Retina & Macular Disease, Winter Haven, FL
- Charles Retina Institution, Memphis, TN
- Connecticut Retina Consultants, Bridgeport, CT
- Davis Duehr Dean, Madison, WI
- Delaware Valley Retina Associates, Lawrenceville, NJ
- East Bay Retina Consultants, Oakland, CA
- East Florida Eye Institute, Stuart, FL
- Fletcher Allen Health Care, Burlington, VT
- Foresight Studies LLC, San Antonio, TX
- Georgia Retina PC, Decatur, GA
- Kresge Eye Institute, Detroit, MI
- Lahey Clinic/The Eye Institute, Peabody, MA
- National Ophthalmic Research, Fort Myers, FL
- New England Retina Associates, Hamden, CT
- New England Retina Associates, New London, CT
- North California Retina Vitreous Associates, Mountain View, CA
- Ochsner Medical Center, New Orleans, LA
- Ophthalmology Associates, Fort Worth, TX; J Parchue, D Bruhl
- OSU Eye Physicians & Surgeons, Dublin, OH
- PA Retina Specialists PC, Camphill, PA
- Retina Associates of Cleveland Inc., Beachwood, OH
- Retina Associates of South Texas, San Antonio, TX
- Retina Associates of Western NY, Rochester, NY
- Retina Associates Southwest PC, Tucson, AZ
- Retina Associates, New York, NY
- Retina Associates, PA Shawnee Mission, KS
- Retina Care Specialists, Palm Beach Gardens, FL
- Retina Consultants Medical Group, Sacramento, CA
- Retina Consultants of Houston, Houston, TX
- Retina Group of Florida, Fort Lauderdale, FL
- Retina Health Center, Fort Myers, FL
- Retina Institute of California, Arcadia, CA
- Retina Specialists, Desoto, TX
- Retina-Vitreous Associates Medical Group, Beverly Hills, CA
- Richmond Retinal Associates, Richmond, VA
- Sarasota Retina Institute, Sarasota, FL
- Southeast Retina Center, Augusta, GA
- Southern CA Desert Retina Consultants, Palm Desert, CA
- Southern Vitreoretinal Associates, Tallahassee, FL
- The Retina Consultants Slingerlands, NY
- UCSD Jacobs Retina Center, La Jolla, CA
- University of New Mexico, Albuquerque, NM
- Vision Research Foundation, Royal Oak, MI
- Vitreoretinal Associates, Seattle, WA
- Vitreo-Retinal Consultants, Wichita, KS
- Vitreoretinal Eye Center, Biloxi, MS
- VMR Institute, Huntington Beach, CA
- West Texas Retina Consultants PA, Abilene, TX
- Wolfe Clinic, West Des Moines, IA

**RISE (NCT00473330)**

- Center for Retina & Macular Disease, Winter Haven, FL
- Cleveland Clinic Foundation, Cleveland, OH
- Colorado Retina Associates PC, Golden, CO
- Doheny Eye Institute, Los Angeles, CA
- East Bay Retina Consultants, Oakland, CA
- Eye Associates of New Mexico, Albuquerque, NM
- Eye Care Associates of East Texas, Tyler, TX
- Eye Centers of Florida, Fort Meyers, FL
- Eye Surgical Associates, Lincoln, NE
- Georgia Retina PC, Decatur, GA
- Illinois Retina Associates, Harvey, IL
- Island Retina, Shirley, NY
- M Rodriguez-Fontal, Retina Consultants of Charleston, Charleston, SC
- Maine Eye Center, Portland, ME
- Massachusetts Eye and Ear Infirmary, Boston, MA
- Medical Center Ophthalmology Associates, San Antonio, TX
- Mid-Atlantic Retina, Philadelphia, PA
- New York Eye & Ear Infirmary, New York, NY
- Opthalmic Consultants of Long Island, Lynbrook, NY
- Pacific Eye Associates, San Francisco, CA
- Palmetto Retina Center, West Columbia, SC
- Retina Associates of New Jersey, Teaneck, N
- Retina Care Specialists, Palm Beach Gardens, FL
- Retina Center of Hawaii, LLC, Honolulu, HI
- Retina Centers PC, Tucson, AZ
- Retina Consultants of Arizona Ltd., Peoria, AZ
- Retina Consultants of Arizona Ltd., Phoenix, AZ
- Retina Consultants of Houston, Houston, TX
- Retina Consultants of Nevada, Las Vegas, NV
- Retina Consultants of San Diego, Poway CA
- Retina Consultants PA, Fort Worth, TX
- Retina Institute of Virginia, Richmond, VA
- Retina Research Center, Austin, TX
- Retina Specialists, Towson, MD
- Retina Vitreous Associates, Toledo, OH
- Retina Vitreous Center, New Brunswick, NJ
- Retina Vitreous Consultants of New Jersey, Englewood, NJ
- Retinal & Ophthalmic Consultants PC, Northfield, NJ
- Retinal Consultants of South California, Westlake Village CA
- Retinal Diagnostic Center, Campbell, CA
- Sarasota Retina Institute, Sarasota, FLs
- Scott and White Hospital, Temple, TX
- South Texas Retinal Consultants, Corpus Christi, TX
- Tennessee Retina PC, Nashville, TN
- The Retina Center at Pali Momi, Aiea, HI
- The University of Texas Southwestern Medical Center at Dallas, Dallas, TX
- University of California Davis, Sacramento, CA
- University of Colorado Health Sciences Center, Aurora, CO
- University of Missouri, Kansas City, MOs
- University of South Florida Eye Institute, Tampa, FL
- University of Texas Medical Research, Galveston, TX
- University of Virginia Medical Center, Charlottesville, VA
- Vitreous-Retina-Macula Consultants of New York PC, New York, NY
- W Carolina Retina Associates, Asheville, NC
- West Coast Retina Medical Group Inc., San Francisco, CA
- Wilmer Eye Institute, Johns Hopkins University, Baltimore, MD
